# Supplementary material for: A Review of the Fungi That Degrade Plastic
Source: MDPI journal article supplement (doi:10.3390/jof8080772), 2022-07-25
Supplement: s1 [file s1]

Table S1. Taxa table for phylogenetic analyses.

| Taxon Name                           | Strain       | GenBank Accession Number |           |          |          |          |          |
|--------------------------------------|--------------|--------------------------|-----------|----------|----------|----------|----------|
|                                      |              | ITS                      | LSU       | SSU      | TEF      | RPB1     | RPB2     |
| <i>Abrothallus buellianus</i>        | SPO 303      | KF816166                 | KF816234  | KF816217 | KF816186 | —        | —        |
| <i>Acremonium alternatum</i>         | CBS 820.70   | MH859959                 | MH871758  | —        | —        | —        | —        |
| <i>Acremonium brachypenium</i>       | CBS 866.73   | MH860815                 | MH872547  | —        | —        | —        | —        |
| <i>Acrospermum adeanum</i>           | M 133        | EU940180                 | EU940104  | EU940031 | —        | —        | EU940320 |
| <i>Aliquandostipite khaoyaiensis</i> | CBS 118232   | —                        | GU301796  | AF201453 | GU349048 | —        | FJ238360 |
| <i>Alternaria alternata</i>          | FA-24        | KJ947119                 | —         | —        | —        | —        | —        |
| <i>Alternaria alternata</i>          | TAA-05       | OL673807                 | —         | OL674053 | —        | —        | —        |
| <i>Alternaria brassicicola</i>       | AC71         | LC440588                 | —         | —        | LC480214 | —        | LC476794 |
| <i>Alternaria brassicicola</i>       | CBS 118699   | —                        | KC584259  | KC584515 | KC584642 | —        | KC584383 |
| <i>Alternaria dauci</i>              | CBS 477.83   | MH861626                 | MH873342  | —        | KJ718509 | —        | KJ718334 |
| <i>Alternaria solani</i>             | AKoSrf       | OK036398                 | OK036421  | OK036375 | —        | —        | —        |
| <i>Anteaglonium parvulum</i>         | GKM 1218     | —                        | GQ221880  | —        | GQ221922 | —        | —        |
| <i>Aplosporella prunicola</i>        | CBS 121167   | KF766147                 | KF766315  | KF766229 | —        | —        | —        |
| <i>Arachnomyces minimus</i>          | CBS 324.70   | —                        | FJ358274  | AJ315167 | —        | —        | —        |
| <i>Arachnomyces nitidus</i>          | —            | —                        | AB075351  | —        | —        | —        | —        |
| <i>Arthonia coreana</i>              | KoLRI 037694 | —                        | KX913670  | —        | —        | —        | KX913668 |
| <i>Arthrimum montagnei</i>           | AFTOL-ID 951 | —                        | DQ471018  | —        | DQ842027 | DQ842033 | DQ842033 |
| <i>Arthroderma curreyi</i>           | CBS 138.26   | KT155805                 | AY176726  | AJ315165 | —        | —        | —        |
| <i>Ascobolus crenulatus</i>          | AFTOL-ID 181 | DQ491504                 | AY544678  | AY544721 | DQ471061 | DQ471132 | DQ470893 |
| <i>Ascosphaera apis</i>              | CBS 402.96   | —                        | FJ358275  | FJ358343 | —        | FJ358406 | —        |
| <i>Ascoaiwania sawadae</i>           | SS00051      | HQ446340                 | HQ446363  | HQ446283 | HQ446306 | —        | HQ446418 |
| <i>Ascothailandia grenadoidia</i>    | SS03615      | GQ390282                 | GQ390267  | GQ390252 | HQ446309 | —        | HQ446420 |
| <i>Aspergillus caespitosus</i>       | SRRC 308     | AY373841                 | —         | —        | —        | —        | —        |
| <i>Aspergillus caespitosus</i>       | NRRL 1929    | NR_131288                | NG_057296 | —        | —        | —        | —        |
| <i>Aspergillus fischeri</i>          | CBS 544.65   | MH858711                 | MH870352  | GU733354 | —        | —        | —        |
| <i>Aspergillus flavus</i>            | ATCC 9643    | HQ026738                 | —         | —        | —        | —        | —        |
| <i>Aspergillus flavus</i>            | FSS63        | KC621105                 | —         | —        | —        | —        | —        |

|                                |               |           |          |          |   |   |          |
|--------------------------------|---------------|-----------|----------|----------|---|---|----------|
| <i>Aspergillus fumigatus</i>   | 502.2_10.4    | MG970388  | —        | —        | — | — | —        |
| <i>Aspergillus fumigatus</i>   | 502.3_13.3    | MG970369  | —        | —        | — | — | —        |
| <i>Aspergillus glaucus</i>     | CBS 297.71    | MH860132  | MH871905 | —        | — | — | —        |
| <i>Aspergillus glaucus</i>     | CBS 529.65    | MH858701  | MH870342 | —        | — | — | —        |
| <i>Aspergillus glaucus</i>     | ATCC 16469    | —         | AY176751 | —        | — | — | —        |
| <i>Aspergillus japonicus</i>   | NRRL 360      | EF661216  | EF661216 | —        | — | — | —        |
| <i>Aspergillus nidulans</i>    | FGSC A4       | KY074657  | KY074658 | MG779511 | — | — | —        |
| <i>Aspergillus nidulans</i>    | RIB40         | —         | —        | MG779508 | — | — | —        |
| <i>Aspergillus nidulans</i>    | Ya10          | —         | —        | MG779507 | — | — | —        |
| <i>Aspergillus nidulans</i>    | T3            | —         | —        | MG779513 | — | — | —        |
| <i>Aspergillus nidulans</i>    | MF 109        | —         | —        | MG779504 | — | — | —        |
| <i>Aspergillus nidulans</i>    | BTK-1         | —         | —        | MG779512 | — | — | —        |
| <i>Aspergillus nidulans</i>    | AD-Jt-1       | —         | —        | MG779506 | — | — | —        |
| <i>Aspergillus nidulans</i>    | JAU1          | —         | —        | MG779505 | — | — | —        |
| <i>Aspergillus nidulans</i>    | AJR1          | —         | —        | MG779510 | — | — | —        |
| <i>Aspergillus nidulans</i>    | Ya1           | —         | —        | MG779509 | — | — | —        |
| <i>Aspergillus niger</i>       | F48-02        | KX664417  | KX664417 | —        | — | — | —        |
| <i>Aspergillus niger</i>       | F21-04        | KX664345  | KX664345 | —        | — | — | —        |
| <i>Aspergillus niger</i>       | ATCC 9642     | FJ195349  | —        | —        | — | — | —        |
| <i>Aspergillus ochraceus</i>   | ICMP 939      | AF128850  | —        | —        | — | — | —        |
| <i>Aspergillus ochraceus</i>   | EN31          | FJ427513  | —        | —        | — | — | —        |
| <i>Aspergillus oryzae</i>      | RIB40         | —         | —        | MG779508 | — | — | —        |
| <i>Aspergillus oryzae</i>      | A540          | KX462996  | —        | —        | — | — | —        |
| <i>Aspergillus protuberus</i>  | AFTOL-ID 5007 | —         | FJ176897 | FJ176842 | — | — | FJ238379 |
| <i>Aspergillus sydowii</i>     | ASAU-1        | KJ524907  | KJ524908 | —        | — | — | —        |
| <i>Aspergillus terreus</i>     | —             | KP033202  | —        | —        | — | — | —        |
| <i>Aspergillus terreus</i>     | IOC_3995      | KM116156  | —        | —        | — | — | —        |
| <i>Aspergillus tubingensis</i> | SBRL2         | OL444885  | —        | —        | — | — | —        |
| <i>Aspergillus tubingensis</i> | KS-C17        | MZ736584  | —        | —        | — | — | —        |
| <i>Aspergillus ustus</i>       | CBS 261.67    | NR_131284 | —        | —        | — | — | —        |
| <i>Aspergillus ustus</i>       | NCC3968       | MT994880  | —        | —        | — | — | —        |
| <i>Aspergillus versicolor</i>  | S66           | KU318417  | KU318415 | —        | — | — | —        |

|                                   |                |           |          |          |          |          |          |
|-----------------------------------|----------------|-----------|----------|----------|----------|----------|----------|
| <i>Aspergillus versicolor</i>     | S61            | KU318416  | KU318414 | —        | —        | —        | —        |
| <i>Aspergillus nomius</i>         | NRRL 13137     | AF027860  | AF027860 | —        | —        | —        | —        |
| <i>Aspergillus nomius</i>         | NRRL 25393     | AF027864  | AF027864 | —        | —        | —        | —        |
| <i>Aspergillus penicillioides</i> | CBS 540.65     | OL772711  | OL772711 | GU733350 | —        | —        | —        |
| <i>Aureobasidium pullulans</i>    | CBS 109810     | FJ150901  | FJ150953 | —        | —        | —        | —        |
| <i>Aureobasidium pullulans</i>    | CBS 701.76     | FJ150907  | FJ150951 | —        | —        | —        | —        |
| <i>Aureobasidium pullulans</i>    | CBS 298.56     | MH857648  | MH869192 | —        | —        | —        | —        |
| <i>Baeomyces rufus</i>            | P78            | KJ462264  | KJ462341 | KR017260 | KR017567 | —        | —        |
| <i>Bagnisiella examinans</i>      | CBS 551.66     | —         | KF766316 | GU296139 | —        | —        | GU371746 |
| <i>Basidiobolus ranarum</i>       | ATCC 14449     | EF392532  | EF392421 | —        | —        | —        | EF392476 |
| <i>Basidiobolus ranarum</i>       | AFTOL-ID 301   | AY997030  | —        | AY635841 | DQ282610 | —        | —        |
| <i>Basidiobolus ranarum</i>       | ARSEF 260      | EF392519  | EF392409 | EF392545 | —        | —        | EF392464 |
| <i>Bezerromyces brasiliensis</i>  | CBS 141545     | KX470390  | KX518623 | KX518627 | KX518631 | —        | —        |
| <i>Bionectria pityrodes</i>       | CBS 102033     | AF210672  | AF210672 | AY249899 | —        | —        | —        |
| <i>Bionectria sesquicillii</i>    | CBS 180.88     | AF210666  | MH873818 | —        | —        | —        | —        |
| <i>Bionectria solani</i>          | CBS 752.68     | AF358246  | MH870947 | —        | —        | —        | —        |
| <i>Blastobotrys adeninivorans</i> | CBS 8244       | EU343811  | LR031515 | —        | —        | EU344080 | EU343884 |
| <i>Blastobotrys adeninivorans</i> | CBS:7370       | KY101742  | KY106200 | —        | —        | —        | —        |
| <i>Blastobotrys adeninivorans</i> | CBS:7377       | KY101745  | KY106198 | —        | —        | —        | —        |
| <i>Botryosphaeria dothidea</i>    | CMW 8000       | NR_111146 | KF766319 | KF766233 | —        | —        | —        |
| <i>Brigantiaea cf. tricolor</i>   | Gaya 70        | JQ301655  | JQ301543 | JQ301603 | —        | JQ301704 | JQ301739 |
| <i>Broomella vitalbae</i>         | MFLUCC 15-0023 | KP757755  | KP757751 | KP757759 | KP757763 | —        | —        |
| <i>Buergenerula spartinae</i>     | ATCC 22848     | JX134666  | DQ341492 | DQ341471 | JX134692 | JX134720 | —        |
| <i>Byssoschlamys nivea</i>        | CBS 100.11     | FJ389934  | AY176750 | —        | —        | JN121551 | JF417414 |
| <i>Caliciopsis nigra</i>          | MA 18191       | —         | KP144011 | —        | —        | —        | —        |
| <i>Caloscypha fulgens</i>         | AFTOL-ID 152   | DQ491483  | DQ247799 | DQ247807 | DQ471054 | DQ471126 | DQ247787 |
| <i>Candida guilliermondii</i>     | —              | AF022719  | —        | —        | —        | —        | —        |
| <i>Capnodium coffeae</i>          | CBS 147.52     | AJ244239  | DQ247800 | DQ247808 | DQ471089 | —        | DQ247788 |
| <i>Capnodium salicinum</i>        | —              | —         | DQ678050 | DQ677997 | —        | —        | —        |
| <i>Capronia pilosella</i>         | —              | DQ826737  | DQ823099 | DQ823106 | DQ840565 | DQ840554 | DQ840561 |
| <i>Catinella olivacea</i>         | UAMH 10679     | DQ915483  | EF622212 | DQ915484 | —        | —        | —        |
| <i>Celothelium cinchonarum</i>    | F 17105        | —         | DQ329020 | —        | —        | —        | —        |

|                                       |                 |           |          |          |          |          |          |
|---------------------------------------|-----------------|-----------|----------|----------|----------|----------|----------|
| <i>Cenangiopsis quercicola</i>        | KL174           | LT158425  | KX090811 | KX090862 | KX090663 | KX090760 | KX090713 |
| <i>Cephalosporium caeruleus</i>       | KF-140          | AY566994  | AY567002 | AY567008 | —        | —        | —        |
| <i>Cephalosporium gramineum</i>       | CBS 132.34      | NR_171209 | MH866942 | HQ322373 | —        | —        | —        |
| <i>Cephalosporium gramineum</i>       | MK08302         | HQ322344  | HQ322372 | HQ322372 | —        | —        | —        |
| <i>Chaenotheca brachypoda</i>         | Prieto 3023     | —         | JX000086 | —        | —        | JX000135 | —        |
| <i>Chaenotheca furfuracea</i>         | Wedin 6366      | JX000101  | JX000087 | JX000068 | —        | JX000137 | —        |
| <i>Chaenotheca trichialis</i>         | Prieto 3028     | JX000102  | JX000085 | JX000069 | —        | JX000136 | —        |
| <i>Chaenothecopsis sitchensis</i>     | —               | JX119102  | JX119111 | —        | —        | —        | —        |
| <i>Chaetomium globosum</i>            | PDL2039         | MW522514  | —        | —        | MW530423 | —        | —        |
| <i>Chaetomium globosum</i>            | PDL2040         | MW522352  | —        | —        | MW530424 | —        | —        |
| <i>Chaetomium globosum</i>            | CBS 164.62      | JN209920  | MH869717 | —        | KF001706 | KF001751 | KF001796 |
| <i>Chaetomium globosum</i>            | CBS 160.62      | NR_144851 | KT214596 | —        | KT214704 | KT214630 | KT214666 |
| <i>Chaetomium longiciliata</i>        | LC4055          | KP336774  | KP336823 | —        | —        | —        | KT149497 |
| <i>Chaetomium tectifimeti</i>         | CBS 142032      | NR_147668 | KX976737 | —        | —        | —        | KX976836 |
| <i>Chaetothyrium agathis</i>          | MFLUCC 12 C0113 | KP744437  | KP744480 | —        | —        | —        | —        |
| <i>Chlorociboria cf. aeruginosa</i>   | AFTOL-ID 151    | DQ491501  | AY544669 | AY544713 | DQ471053 | DQ471125 | DQ470886 |
| <i>Chrysothrix candelaris</i>         | Frisch 11/Se45  | —         | KF707640 | —        | —        | —        | KF707663 |
| <i>Cladonia caroliniana</i>           | AFTOL-ID 3      | DQ782832  | AY584640 | AY584664 | DQ782888 | DQ782816 | AY584684 |
| <i>Cladosporium cladosporioides</i>   | CPC 14705       | HM148050  | —        | —        | HM148291 | —        | —        |
| <i>Cladosporium cladosporioides</i>   | CPC 15038       | HM148051  | —        | —        | HM148292 | —        | —        |
| <i>Cladosporium cladosporioides</i>   | CSPF3           | KU508795  | —        | —        | —        | —        | —        |
| <i>Cladosporium silenes</i>           | CBS 109082      | NR_111270 | JF770463 | —        | EF679429 | —        | —        |
| <i>Clonostachys ochroleuca</i>        | AFTOL-ID 187    | —         | DQ862027 | DQ862044 | DQ862029 | —        | DQ862013 |
| <i>Colletotrichum gloeosporioides</i> | LC0555          | JN943090  | JN940412 | JN940356 | —        | JN984972 | —        |
| <i>Cordyceps militaris</i>            | OSC 93623       | JN049825  | AY184966 | AY184977 | DQ522332 | DQ522377 | —        |
| <i>Corynelia fructigena</i>           | AW 250          | KP881704  | KP881716 | KP881720 | —        | —        | —        |
| <i>Cosmospora coccinea</i>            | AR2741          | —         | AY489734 | AY489702 | AY489629 | AY489667 | —        |
| <i>Crocynia pyxinoides</i>            | AFTOL-ID 111    | —         | AY584653 | AY584677 | DQ883767 | DQ883735 | DQ883748 |
| <i>Cryptococcus aquaticus</i>         | CBS 5443        | AF410469  | AF075470 | AB032621 | —        | —        | —        |
| <i>Cryptococcus huempfi</i>           | CBS 8186        | AF444322  | AF189844 | AB032636 | —        | —        | —        |
| <i>Cryptococcus laurentii</i>         | CL19            | JN627001  | JQ968480 | JX393955 | —        | —        | —        |
| <i>Cryptococcus laurentii</i>         | CL18            | JN627000  | JQ968479 | JX393954 | —        | —        | —        |

|                                   |                |           |           |           |          |          |          |
|-----------------------------------|----------------|-----------|-----------|-----------|----------|----------|----------|
| <i>Cryptococcus macerans</i>      | CBS 2206       | AF444329  | AF189848  | AB032642  | —        | —        | —        |
| <i>Cryptococcus magnus</i>        | RKI-06-00213   | GU979219  | GU979218  | —         | —        | —        | —        |
| <i>Cryptococcus magnus</i>        | CBS140         | AF190008  | AF181851  | —         | KF037068 | KF036383 | KF036796 |
| <i>Cudoniella clavus</i>          | AFTOL-ID 166   | DQ491502  | DQ470944  | DQ470992  | DQ471056 | DQ471128 | DQ470888 |
| <i>Curvularia lunata</i>          | CATAS-CL33     | MW186189  | MW186194  | —         | —        | —        | —        |
| <i>Curvularia lunata</i>          | CATAS-CL26     | MW186188  | MW186193  | —         | —        | —        | —        |
| <i>Curvularia protuberata</i>     | CBS 376.65     | MH858620  | MH870260  | —         | KM196576 | —        | HG779176 |
| <i>Cyphellophora laciniata</i>    | CBS 190.61     | EU035416  | FJ358239  | FJ358307  | —        | FJ358370 | —        |
| <i>Dactylospora haliotrepha</i>   | AFTOL-ID758    | —         | FJ176855  | FJ176802  | —        | —        | FJ238344 |
| <i>Dactylospora mangrovei</i>     | AFTOL-ID 2108  | —         | FJ176890  | FJ176836  | FJ238411 | KJ766849 | FJ238375 |
| <i>Dactylospora vrijmoediae</i>   | NTOU4002       | NR_138396 | KC692153  | KC692152  | —        | —        | KC692154 |
| <i>Debaryomyces fabryi</i>        | CBS:789        | KY103198  | KY107491  | —         | —        | —        | —        |
| <i>Debaryomyces hansenii</i>      | SLDY-294       | MH782058  | —         | —         | —        | —        | —        |
| <i>Debaryomyces hansenii</i>      | clone 28       | —         | KF488760  | —         | —        | —        | —        |
| <i>Debaryomyces hansenii</i>      | clone 187      | —         | KF488792  | —         | —        | —        | —        |
| <i>Debaryomyces maramus</i>       | CBS:1958       | KY103271  | KY107572  | —         | —        | —        | —        |
| <i>Diatrype disciformis</i>       | AFTOL-ID 927   | —         | DQ470964  | DQ471012  | DQ471085 | DQ471158 | —        |
| <i>Dolabra nepheliae</i>          | CBS 122120     | —         | GU332517  | —         | GU332523 | GU332521 | —        |
| <i>Dothidea insculpta</i>         | CBS 189.58     | AF027764  | DQ247802  | DQ247810  | DQ471081 | —        | AF107800 |
| <i>Dothiorella iberica</i>        | CBS 115041     | NR_111165 | AY928053  | KF766245  | —        | —        | —        |
| <i>Dyfrlolomyces tiomanensis</i>  | NTOU3636       | —         | KC692156  | KC692155  | KC692157 | —        | —        |
| <i>Edenia gomezpompae</i>         | CBS 124106     | NR_156217 | NG_059202 | —         | —        | —        | —        |
| <i>Emericellopsis minima</i>      | CBS 388.70     | MH859751  | MH871510  | —         | —        | —        | —        |
| <i>Emericellopsis minima</i>      | CBS 488.71     | MH860228  | MH871996  | —         | —        | —        | —        |
| <i>Encephalographa elisae</i>     | EB 0347        | —         | GU397343  | GU397358  | —        | —        | —        |
| <i>Encoelia furfuracea</i>        | KL107          | LT158416  | KX090798  | KX090850  | KX090653 | KX090749 | KX090701 |
| <i>Endogone pisiformis</i>        | KPM:NC0024233  | —         | LC002630  | LC107349  | LC107391 | LC431135 | —        |
| <i>Endogone botryocarpus</i>      | KPM NC0026731  | —         | NG_068251 | NG_070795 | LC431111 | —        | —        |
| <i>Epibryon plagiochilae</i>      | M187           | EU940201  | EU940124  | —         | —        | —        | EU940337 |
| <i>Eremithallus costaricensis</i> | Luecking 16273 | —         | EU622919  | —         | —        | EU622921 | —        |
| <i>Eurotium herbariorum</i>       | NRRL 116       | EF652052  | U29553    | AB002069  | —        | —        | —        |
| <i>Exophiala dermatitidis</i>     | —              | DQ826738  | DQ823100  | DQ823107  | DQ840566 | DQ840555 | DQ840562 |

|                                  |                |           |          |          |          |          |          |
|----------------------------------|----------------|-----------|----------|----------|----------|----------|----------|
| <i>Exophiala jeanselmei</i>      | CBS 507.90     | AY156963  | KJ930161 | —        | EF551530 | —        | —        |
| <i>Exophiala jeanselmei</i>      | D12G           | MT023611  | MT023628 | —        | —        | —        | —        |
| <i>Falcocladium thailandicum</i> | CBS 121717     | JF831939  | JF831934 | JF831930 | —        | KM232286 | —        |
| <i>Flammeascooma lignicola</i>   | MFLUCC 10-0128 | KT324582  | KT324583 | KT324584 | —        | —        | KT324586 |
| <i>Fusarium solani</i>           | NRRL 32492     | EU329679  | EU329679 | —        | DQ246990 | —        | EU329584 |
| <i>Fusarium solani</i>           | NRRL 46702     | EU329711  | EU329711 | —        | —        | —        | EU329660 |
| <i>Fusarium solani</i>           | MRC 2565       | MH582400  | —        | —        | MH582420 | —        | MH582410 |
| <i>Fusarium solani</i>           | NRRL 46699     | EU329708  | EU329708 | —        | —        | —        | EU329657 |
| <i>Fusarium verticillioides</i>  | CBS 128816     | MH865159  | MH876599 | —        | —        | —        | —        |
| <i>Fusarium verticillioides</i>  | CBS 127178     | MH864460  | MH875900 | —        | —        | —        | —        |
| <i>Fusarium oxysporum</i>        | KUMBPIBT-70    | OL679453  | —        | —        | —        | —        | —        |
| <i>Fusarium oxysporum</i>        | KUMBNPIBT-69   | OL504748  | —        | —        | —        | —        | —        |
| <i>Geoglossum nigratum</i>       | AFTOL_ID 56    | DQ491490  | AY544650 | AY544694 | DQ471044 | DQ471115 | DQ470879 |
| <i>Gibellulopsis nigrescens</i>  | DAOM 226890    | GU180631  | GU180648 | GU180613 | —        | —        | GU180664 |
| <i>Gliocladium roseum</i>        | G97012         | AJ309334  | —        | —        | —        | —        | —        |
| <i>Glomerella cingulata</i>      | ATP0507C       | EU358953  | EU358953 | —        | —        | —        | —        |
| <i>Glomerella cingulata</i>      | ATP0407B       | EU358952  | EU358952 | —        | —        | —        | —        |
| <i>Gnomonia gnomon</i>           | CBS 199.53     | AY818956  | AF408361 | DQ471019 | DQ471094 | —        | DQ470922 |
| <i>Guignardia mangiferae</i>     | 1095           | EU683671  | —        | —        | EU683652 | —        | —        |
| <i>Gymnoascus reesii</i>         | CBS 259.61     | —         | FJ358284 | FJ358349 | —        | FJ358411 | —        |
| <i>Herpomyces chaetophilus</i>   | 602b           | KT800039  | KT800009 | KT800023 | —        | —        | —        |
| <i>Herpomyces periplanetae</i>   | 602c           | KT800041  | KT800010 | KT800025 | —        | —        | —        |
| <i>Humicola insolens</i>         | CBS 147.64     | MH858398  | MH870026 | —        | —        | —        | —        |
| <i>Hysterium angustatum</i>      | CBS 236.34     | —         | FJ161180 | GU397359 | FJ161096 | GU456341 | FJ161117 |
| <i>Kylindria peruamazonensis</i> | CBS 421.95     | GU291800  | HM237325 | —        | —        | —        | —        |
| <i>Laboulbenia pedicellata</i>   | H84-1          | —         | KY350537 | KY523244 | —        | —        | —        |
| <i>Lecanographa amylacea</i>     | Thor 26176     | —         | KF707639 | —        | —        | —        | KF707659 |
| <i>Leptosphaeria sp.</i>         | KK-2015        | KP747710  | —        | —        | —        | —        | —        |
| <i>Leptosphaeria irregularis</i> | MFLUCC 15-1118 | NR_171725 | KX856055 | —        | KX856058 | —        | KX856057 |
| <i>Letrouitia domingensis</i>    | Gaya 55        | JQ301673  | JQ301569 | JQ301625 | —        | JQ301719 | JQ301764 |
| <i>Letrouitia parabola</i>       | Gaya 11        | JQ301675  | JQ301570 | JQ301626 | —        | JQ301720 | JQ301765 |
| <i>Lichenocodium aeruginosum</i> | JL359-09       | —         | HQ174269 | —        | —        | —        | —        |

|                                        |              |                 |                 |                 |                 |          |                 |
|----------------------------------------|--------------|-----------------|-----------------|-----------------|-----------------|----------|-----------------|
| <i>Lichenocodium erodens</i>           | JL363-09     | —               | HQ174267        | —               | —               | —        | —               |
| <i>Lichenothelia arida</i>             | L2198        | —               | KR045755        | —               | —               | —        | —               |
| <i>Lichinella iodopulchra</i>          | AFTOL-ID 896 | DQ842016        | DQ782916        | —               | DQ832327        | DQ782857 | DQ832328        |
| <i>Lindra thalassiae</i>               | AFTOL-ID 413 | DQ491508        | DQ470947        | DQ470994        | DQ471065        | DQ471139 | DQ470897        |
| <i>Lipomyces chichibuensis</i>         | NBRC 109582  | AB828723        | AB828721        | —               | —               | —        | —               |
| <i>Lipomyces spencermartinsiae</i>     | CBS 5608     | JN943148        | NG_055385       | —               | DQ496132        | —        | JN985491        |
| <i>Loramyces macrosporus</i>           | AFTOL-ID 913 | JN033383        | DQ470957        | DQ471005        | DQ471076        | DQ471149 | DQ470907        |
| <i>Loxosporopsis corallifera</i>       | T1087        | KR017089        | KR017219        | KR017264        | KR017572        | —        | KR017516        |
| <i>Macrohilum eucalypti</i>            | CPC 10945    | DQ195781        | DQ195793        | DQ195804        | —               | —        | —               |
| <i>Malbranchea cinnamomea</i>          | CBS 343.55   | MH857506        | MH869046        | JQ067912        | —               | —        | —               |
| <i>Malbranchea cinnamomea</i>          | CBS 960.72   | JF922020        | —               | GU733363        | —               | —        | —               |
| <i>Manglicola guatemalensis</i>        | BCC 20156    | JN819283        | FJ743448        | FJ743442        | —               | —        | —               |
| <i>Marcelleina persoonii</i>           | AFTOL-ID 164 | —               | DQ470943        | DQ470991        | DQ471055        | DQ471127 | DQ470887        |
| <i>Melanomma pulvis-pyrius</i>         | CBS 124080   | —               | GU456323        | GU456302        | GU456265        | —        | GU456350        |
| <i>Melanops tulasnei</i>               | CBS 116805   | NR_138372       | KF766365        | KF766282        | —               | —        | —               |
| <i>Metschnikowia noctiluminum</i>      | CBS:9907     | GU931705        | KY108488        | —               | KC859829        | —        | KC859706        |
| <i>Microascus trigonosporus</i>        | AFTOL-ID 914 | DQ491513        | DQ470958        | DQ471006        | DQ471077        | DQ471150 | DQ470908        |
| <i>Microbotryum violaceum</i>          | GLM 50283    | NR_119596       | NG_042441       | —               | —               | —        | —               |
| <i>Microbotryum adenopetalae</i>       | KRAM F 55201 | NR_119576       | NG_042418       | —               | —               | —        | —               |
| <i>Microbotryum silenae-saxifragae</i> | KR M 23890   | NR_119964       | NG_042585       | —               | —               | —        | —               |
| <i>Mollisia cinerea</i>                | AFTOL-ID 76  | DQ491498        | DQ470942        | DQ470990        | DQ471051        | DQ471122 | DQ470883        |
| <i>Monascus ruber</i>                  | ATCC 16371   | AY498572        | AF364996        | —               | —               | —        | —               |
| <i>Monascus ruber</i>                  | PUR_73       | KX495607        | —               | —               | —               | —        | —               |
| <i>Monascus sanguineus</i>             | PUR_193      | KX495608        | —               | —               | —               | —        | —               |
| <i>Monascus sp.</i>                    | PUR_196      | KX495609        | —               | —               | —               | —        | —               |
| <i>Monilinia fructicola</i>            | M126         | KY781235        | —               | —               | —               | —        | —               |
| <i>Monilinia fructicola</i>            | M127         | KY781236        | —               | —               | —               | —        | —               |
| <i>Monilochaetes dimorphospora</i>     | MUCL 40959   | NR_137765       | HQ609480        | HQ609487        | —               | —        | —               |
| <i>Morchella importuna</i>             | HKAS 55009   | <b>MG871294</b> | <b>MG871328</b> | <b>MG859242</b> | <b>MG980694</b> | —        | <b>MG980719</b> |
| <i>Mortierella cf. wolfii</i>          | CBS 614.70   | JX975975        | HQ667420        | HQ667500        | —               | —        | —               |
| <i>Mortierella wolfii</i>              | CBS 209.69   | JN943805        | JN940864        | JQ040256        | —               | JN985290 | —               |
| <i>Mucor ardhlaengiktus</i>            | CBS 210.80   | JN206172        | MH873025        | MT523946        | —               | —        | —               |

|                                    |                |           |          |          |          |          |          |
|------------------------------------|----------------|-----------|----------|----------|----------|----------|----------|
| <i>Mucor hiemalis</i>              | CBS 127123     | MH864430  | MH875868 | —        | —        | —        | —        |
| <i>Mucor hiemalis</i>              | CBS 126912     | MH864336  | MH875781 | —        | —        | —        | —        |
| <i>Mucor zychae</i>                | CBS 389.35     | MH855717  | MH867229 | —        | —        | —        | —        |
| <i>Mucor janssenii</i>             | CBS 185.68     | JN206006  | MH870818 | MT523921 | —        | —        | —        |
| <i>Myceliophthora thermophila</i>  | UAMH 2474      | HQ724321  | HQ724320 | —        | —        | —        | —        |
| <i>Mycocalicium subtile large</i>  | Tibell 16744   | —         | AY796004 | —        | —        | —        | —        |
| <i>Myriangium hispanicum</i>       | CBS 247.33     | KX887304  | GU301854 | GU296180 | GU349055 | GU357775 | GU371744 |
| <i>Myrothecium gramineum</i>       | CY176          | HQ608010  | —        | —        | —        | —        | —        |
| <i>Mytilinidion mytilinellum</i>   | CBS 303.34     | —         | FJ161184 | FJ161144 | FJ161100 | GU357810 | FJ161119 |
| <i>Nectria cinnabarina</i>         | GJS 89-107     | —         | U00748   | —        | AF543785 | —        | —        |
| <i>Nectria mariae</i>              | A.R. 4274      | JF832629  | JF832684 | —        | JF832542 | JF832789 | —        |
| <i>Nectria mariae</i>              | CBS 125294     | NR_160238 | —        | —        | JF832542 | —        | KM232404 |
| <i>Neolecta irregularis</i>        | AFTOL-ID 1363  | —         | DQ470986 | —        | —        | —        | —        |
| <i>Neolecta vitellina</i>          | AFTOL-ID 1362  | —         | DQ470985 | —        | —        | —        | —        |
| <i>Neophaeococomyces aloes</i>     | CPC 21873      | KF777182  | KF777234 | —        | —        | —        | —        |
| <i>Neurospora sitophila</i>        | —              | GU192459  | —        | —        | —        | —        | —        |
| <i>Niesslia exilis</i>             | CBS 357.70     | —         | AY489718 | AY489686 | AY489613 | AY489645 | —        |
| <i>Olpidium brassicae</i>          | AFTOL-ID 633   | NR_119544 | —        | DQ322624 | DQ275349 | —        | —        |
| <i>Onygena equina</i>              | ATCC 22731     | —         | AY176717 | —        | —        | —        | —        |
| <i>Ophiocordyceps aurantiaca</i>   | OSC 128578     | JN049833  | DQ518770 | DQ522556 | DQ522345 | DQ522391 | DQ522445 |
| <i>Ophiocordyceps gracilis</i> OSC | OSC 151906     | —         | KJ878890 | KJ878923 | KJ878969 | —        | —        |
| <i>Ophiodiaporthe cyatheae</i>     | YMJ 1364       | JX570889  | JX570891 | JX570890 | KC465406 | —        | JX570893 |
| <i>Ophiostoma piliferum</i>        | AFTOL-ID 910   | —         | DQ470955 | DQ471003 | DQ471074 | DQ471147 | —        |
| <i>Orbilina auricolor</i>          | AFTOL-ID 906   | DQ491512  | DQ470953 | DQ471001 | DQ471072 | —        | DQ470903 |
| <i>Orbilina vinosa</i>             | AFTOL-ID 905   | DQ491511  | DQ470952 | DQ471000 | DQ471071 | DQ471145 | —        |
| <i>Oxydothis metroxylonis</i>      | MFLUCC 15-0806 | KY206776  | KY206765 | KY206771 | KY206780 | —        | KY206782 |
| <i>Paecilomyces brunneolus</i>     | CBS 370.70     | EU037050  | —        | —        | —        | —        | —        |
| <i>Paecilomyces farinosus</i>      | MYA 3388       | DQ374646  | —        | —        | —        | —        | —        |
| <i>Paecilomyces farinosus</i>      | RCEF446        | AF368797  | —        | —        | —        | —        | —        |
| <i>Paecilomyces lilacinus</i>      | IFM 53352      | AB363751  | —        | —        | —        | —        | —        |
| <i>Paecilomyces lilacinus</i>      | AW2-1121       | AB558287  | —        | —        | —        | —        | —        |
| <i>Paecilomyces marquandii</i>     | CBS 182.27     | AY624193  | EF468845 | EF468990 | —        | —        | —        |



|                                   |                 |          |           |          |          |          |          |
|-----------------------------------|-----------------|----------|-----------|----------|----------|----------|----------|
| <i>Papulosa amerospora</i>        | AFTOL-ID 748    | —        | DQ470950  | DQ470998 | DQ471069 | DQ471143 | DQ470901 |
| <i>Paraphoma sp.</i>              | B47-9           | AB693768 | LC126021  | LC126020 | —        | —        | —        |
| <i>Paraphoma radicina</i>         | CBS 111.79      | MH861183 | MH872952  | EU754092 | KF253130 | —        | KF252180 |
| <i>Parengyodontium album</i>      | CBS 368.72      | MH860502 | MH872217  | —        | LC382183 | —        | —        |
| <i>Parengyodontium album</i>      | CBS 836.71      | MH860372 | MH872118  | —        | LC382178 | —        | —        |
| <i>Patellaria atrata</i>          | CBS 958.97      | —        | GU301855  | GU296181 | GU349038 | GU357749 | GU371726 |
| <i>Peltula euploca</i>            | Buedel 14921c-1 | MF766354 | MF766395  | MF766272 | —        | —        | —        |
| <i>Peltula hassei</i>             | Buedel 14354a   | MF766365 | MF766406  | MF766283 | —        | —        | —        |
| <i>Penicillium adametzii</i>      | CBS 130200      | MH865748 | MH877181  | —        | —        | —        | —        |
| <i>Penicillium chermesinum</i>    | CBS 231.81      | MH861332 | MH873092  | —        | —        | —        | MN969111 |
| <i>Penicillium daleae</i>         | CBS 114839      | MH862971 | NG_064184 | —        | —        | —        | —        |
| <i>Penicillium funiculosum</i>    | KCTC16072       | —        | —         | AF245267 | —        | —        | —        |
| <i>Penicillium funiculosum</i>    | NRRL 6417       | GQ221866 | GQ221866  | —        | —        | —        | —        |
| <i>Penicillium funiculosum</i>    | NRRL 35431      | GU183120 | GU183120  | —        | —        | —        | —        |
| <i>Penicillium griseofulvum</i>   | PG3             | KJ467353 | —         | —        | —        | —        | —        |
| <i>Penicillium hirayamae</i>      | CBS 238.65      | MH858553 | —         | —        | JN626135 | —        | —        |
| <i>Penicillium janthinellum</i>   | CBS 129616      | MH865455 | MH876915  | —        | —        | —        | —        |
| <i>Penicillium minioluteum</i>    | CBS 642.68      | AY213674 | AY213618  | —        | —        | —        | JF417443 |
| <i>Penicillium oxalicum</i>       | MSS1026         | MZ157156 | —         | —        | —        | —        | MZ190931 |
| <i>Penicillium pinophilum</i>     | NRRL 25074      | GQ428200 | GQ428200  | —        | —        | —        | —        |
| <i>Penicillium pinophilum</i>     | NRRL 58691      | GQ337428 | GQ337428  | —        | —        | —        | —        |
| <i>Penicillium pinophilum</i>     | NRRL 6420       | GQ221867 | GQ221867  | —        | —        | —        | —        |
| <i>Penicillium roqueforti</i>     | CCDM 294        | MW600470 | —         | —        | —        | —        | —        |
| <i>Penicillium roqueforti</i>     | CCDM 296        | MW600465 | —         | —        | —        | —        | —        |
| <i>Penicillium simplicissimum</i> | CBS 281.58      | MH857784 | MH869319  | —        | —        | —        | —        |
| <i>Penicillium simplicissimum</i> | CBS 340.48      | MH856376 | MH867923  | —        | —        | —        | —        |
| <i>Penicillium simplicissimum</i> | CBS 280.39      | MH856014 | MH867512  | —        | —        | —        | —        |
| <i>Penicillium verruculosum</i>   | SG3             | KC416630 | JX863916  | —        | —        | —        | —        |
| <i>Penicillium verruculosum</i>   | ATHUM 5186      | FJ004320 | FJ004378  | —        | —        | —        | FJ004498 |
| <i>Pestalotiopsis microspora</i>  | E2520A          | KT996035 | —         | —        | —        | —        | —        |
| <i>Pestalotiopsis microspora</i>  | E2708A          | KT996045 | —         | —        | —        | —        | —        |
| <i>Pestalotiopsis microspora</i>  | E2711A          | KT996047 | —         | —        | —        | —        | —        |

|                                        |                |           |           |           |          |          |          |
|----------------------------------------|----------------|-----------|-----------|-----------|----------|----------|----------|
| <i>Pestalotiopsis microspora</i>       | E2712A         | KT996048  | —         | —         | —        | —        | —        |
| <i>Pestalotiopsis microspora</i>       | E2911H         | KT996057  | —         | —         | —        | —        | —        |
| <i>Pestalotiopsis microspora</i>       | E3412F         | KT996065  | —         | —         | —        | —        | —        |
| <i>Phaeosphaeria sinensis</i>          | MFLUCC 18-1552 | NR_163350 | NG_070076 | NG_065788 | MK360072 | —        | —        |
| <i>Phaeosphaeria breonardiae</i>       | CPC 25944      | NR_155675 | KX228345  | —         | KX228379 | —        | —        |
| <i>Phaffomyces thermotolerans</i>      | CBS:7012       | KY104502  | KY108772  | —         | —        | —        | —        |
| <i>Phanerochaete australosanguinea</i> | MA Fungi 91309 | NR_164585 | NG_066411 | —         | —        | —        | —        |
| <i>Phanerochaete chrysosporium</i>     | CBS 481.73     | MH860750  | MH872462  | —         | —        | —        | —        |
| <i>Phanerochaete chrysosporium</i>     | CBS 363.65     | MH858610  | MH870252  | —         | —        | —        | —        |
| <i>Phanerochaete concrescens</i>       | Spirin 7322    | NR_155027 | KP994382  | —         | —        | —        | —        |
| <i>Phanerochaete tamariciphila</i>     | CBS 339.95     | MH862517  | MH874157  | —         | —        | —        | —        |
| <i>Phialophora alba</i>                | ICMP:17034     | HM116755  | —         | —         | —        | —        | —        |
| <i>Phoma odoratissimi</i>              | CGMCC 3.17488  | KP330435  | KP330447  | —         | —        | —        | KP330406 |
| <i>Phoma herbarum</i>                  | CBS 615.75     | KF251212  | KF251715  | EU754087  | KF253168 | —        | KF252217 |
| <i>Pichia manshurica</i>               | CBS:209        | KY104597  | KY108860  | —         | —        | —        | —        |
| <i>Plectosphaerella populi</i>         | CBS 139624     | KR476751  | MH878144  | —         | —        | —        | —        |
| <i>Pleostigma jungermannicola</i>      | M174           | EU940195  | EU940119  | EU940046  | —        | —        | EU940331 |
| <i>Pleurotheciella rivularia</i>       | CBS 125238     | NR_111711 | JQ429232  | JQ429244  | —        | —        | JQ429263 |
| <i>Pleurotus cystidiosus</i>           | CBS 100129     | NR_103594 | NG_057793 | —         | —        | —        | —        |
| <i>Pleurotus ostreatus</i>             | PLO6           | KC782771  | —         | —         | —        | —        | —        |
| <i>Pleurotus ostreatus</i>             | CCRC 36524     | AY265830  | —         | —         | —        | —        | —        |
| <i>Polyblastia viridescens</i>         | AFTOL-ID 2240  | —         | EF643771  | EF689855  | —        | EF689774 | —        |
| <i>Polyporus arcularius</i>            | Cui 11398      | KU189766  | KU189797  | KU189826  | KU189911 | KU189884 | KU189980 |
| <i>Polyporus brumalis</i>              | Cui 10750      | KU189765  | KU189796  | KU189825  | KU189910 | KU189883 | KU189979 |
| <i>Polyporus ciliatus</i>              | Wei 1582       | KU189767  | KU189798  | KU189827  | KU189912 | —        | KU189981 |
| <i>Polyporus squamosus</i>             | Cui 10595      | KU189778  | KU189809  | KU189840  | KU189925 | KU189892 | KU189988 |
| <i>Polyporus umbellatus</i>            | Pen 13513      | KU189772  | KU189803  | KU189832  | KU189917 | KU189887 | KU189985 |
| <i>Polyporus vatiis</i>                | Cui 12249      | KU507581  | KU507583  | KU507587  | KU507591 | KU507589 | KU507592 |
| <i>Polyporus vatiis</i>                | Dai 13874      | KU189777  | KU189808  | KU189838  | KU189923 | KU189891 | KU189987 |
| <i>Polytolypa hystricis</i>            | UAMH 7299      | AY527405  | AY176718  | —         | —        | —        | —        |
| <i>Pseudohalonectria hampshirensis</i> | MFLUCC 15-0774 | —         | KX426218  | KX426221  | KX426224 | —        | —        |
| <i>Pseudotulostoma japonica</i>        | TNS-F11152     | —         | AB161194  | —         | —        | —        | —        |

|                                     |                |           |           |           |          |          |          |
|-------------------------------------|----------------|-----------|-----------|-----------|----------|----------|----------|
| <i>Pseudozyma abaconensis</i>       | CBS8380        | FJ008053  | FJ008047  | —         | —        | —        | —        |
| <i>Pseudozyma alboarmeniaca</i>     | DMST17135      | AB117961  | AB117961  | —         | —        | —        | —        |
| <i>Pseudozyma antarctica</i>        | JCM10317       | AB089358  | AB089359  | —         | —        | —        | —        |
| <i>Pseudozyma antarctica</i>        | JCM3941        | AB089360  | AB089361  | —         | —        | —        | —        |
| <i>Pseudozyma brasiliensis</i>      | GHG001         | KF737866  | KF737866  | KF737866  | —        | —        | —        |
| <i>Pulvinula archeri</i>            | BAP 458        | —         | DQ220392  | U62012    | KC109270 | JX943662 | JX943771 |
| <i>Pyrenula cruenta</i>             | —              | KC592268  | AF279407  | AF279406  | —        | —        | AY641067 |
| <i>Pyrgillus javanicus</i>          | —              | DQ826741  | DQ823103  | DQ823110  | —        | —        | DQ842009 |
| <i>Pyronema domesticum</i>          | AFTOL-ID 949   | DQ491517  | NG_027655 | NG_013185 | DQ471093 | DQ471166 | DQ247795 |
| <i>Pyxidiophora arvernensis</i>     | AFTOL-ID 2197  | —         | FJ176894  | FJ176839  | FJ238412 | —        | FJ238377 |
| <i>Rasamsonia argillacea</i>        | CBS 408.73     | MH860718  | MH872429  | —         | —        | —        | —        |
| <i>Rasamsonia argillacea</i>        | CBS 128787     | JF417475  | —         | —         | —        | —        | —        |
| <i>Rhizina undulata</i>             | AFTOL-ID 918   | —         | DQ470961  | DQ471009  | DQ471080 | DQ471153 | DQ470911 |
| <i>Rhizopus americanus</i>          | CBS 340.62     | HM999967  | NG_057873 | NG_062623 | AB512262 | —        | —        |
| <i>Rhizopus arrhizus</i>            | IAL 7305       | OL584187  | —         | —         | —        | —        | —        |
| <i>Rhizopus arrhizus</i>            | CBS 112.07     | NR_103595 | NG_056282 | NG_062621 | AB281528 | KJ566313 | —        |
| <i>Rhizopus delemar</i>             | CBS 392.95     | MH862535  | MH874170  | —         | —        | —        | —        |
| <i>Rhizopus delemar</i>             | CBS 406.51     | MH856921  | MH868444  | —         | AB281555 | KJ566366 | —        |
| <i>Rhizopus oryzae</i>              | NBRC 4759      | AB512275  | —         | —         | AB512272 | —        | —        |
| <i>Rhodospiridium sphaerocarpum</i> | CBS 9082       | AF444659  | AF444754  | —         | —        | —        | —        |
| <i>Rhodospiridium sphaerocarpum</i> | CBS 9079       | AF444656  | AF444751  | —         | —        | —        | —        |
| <i>Rhodospiridium babjevae</i>      | UCDFST 04-877  | KR149271  | KU609429  | —         | —        | —        | —        |
| <i>Rhodospiridium diobovatum</i>    | TEM15          | KC182127  | JQ779973  | —         | —        | —        | —        |
| <i>Rhytidhysterium rufulum</i>      | MFlucc 14-0577 | Ku377560  | Ku377565  | Ku377570  | Ku510399 | —        | —        |
| <i>Rocella montagnei</i>            | Ertz 13069     | GU137908  | GU138026  | —         | —        | —        | GU137662 |
| <i>Roccellographa cretacea</i>      | AFTOL-ID 93    | —         | DQ883696  | DQ883705  | DQ883733 | DQ883716 | DQ883713 |
| <i>Saccharomyces cerevisiae</i>     | CBS:457        | KY105081  | KY109267  | —         | —        | —        | —        |
| <i>Saccharomycodes ludwigii</i>     | CBS:2624       | KY105245  | KY109478  | —         | —        | —        | —        |
| <i>Saccharomycopsis guyanensis</i>  | CLIB 1454      | HG939420  | HG764731  | —         | —        | —        | —        |
| <i>Sarcinomyces petricola</i>       | —              | AJ244274  | FJ176893  | Y18702    | —        | —        | FJ238376 |
| <i>Sarocladium kiliense</i>         | CBS 122.29     | AJ621775  | HQ232052  | HQ232198  | —        | —        | —        |
| <i>Sarocladium kiliense</i>         | CBS 157.61     | MH858006  | MH869564  | —         | —        | —        | —        |

|                                      |               |                 |                 |                 |                 |          |                 |
|--------------------------------------|---------------|-----------------|-----------------|-----------------|-----------------|----------|-----------------|
| <i>Savoryella lignicola</i>          | NF00204       | HQ446357        | HQ446378        | HQ446300        | HQ446334        | —        | —               |
| <i>Sirococcus conigenus</i>          | CBS 119615    | NR_145277       | —               | —               | EF512532        | —        | —               |
| <i>Sphaerocreas pubescens</i>        | NBRC 109377   | —               | LC107618        | —               | LC107619        | LC431150 | —               |
| <i>Sphaerostilbella berkeleyanan</i> | CBS 102308    | KU382208        | U00756          | AF543770        | AF543783        | AY489671 | DQ522465        |
| <i>Sphinctrina leucopoda</i>         | Kalb 33829    | AY795875        | AY796006        | —               | —               | —        | —               |
| <i>Spiromastix warcupii</i>          | —             | DQ782848        | DQ782909        | DQ782882        | —               | —        | DQ782870        |
| <i>Stachybotrys chlorohalonata</i>   | UAMH6417      | AF206273        | AY489712        | AY489680        | AY489607        | AY489640 | —               |
| <i>Stephanonectria keithii</i>       | GJS92-133     | —               | AY489727        | AY489695        | AY489622        | AY489657 | —               |
| <i>Symbiotaphrina buchneri</i>       | CBS:6902      | —               | KY109806        | —               | —               | —        | —               |
| <i>Symbiotaphrina microtheca</i>     | DVLH          | —               | KJ004453        | —               | —               | —        | —               |
| <i>Taphrina deformans</i>            | AFTOL-ID 1234 | —               | DQ470973        | DQ471024        | DQ471097        | DQ471170 | DQ470927        |
| <i>Taphrina wiesneri</i>             | IAM 14515     | —               | AY548292        | AY548293        | —               | —        | AY548298        |
| <i>Thermoascus aurantiacus</i>       | CBS 398.64    | MH858464        | MH870100        | —               | —               | —        | —               |
| <i>Thermoascus aurantiacus</i>       | CBS 415.62    | MH858196        | MH869794        | —               | —               | —        | —               |
| <i>Thermoascus crustaceus</i>        | CBS 374.62    | —               | FJ358289        | —               | —               | —        | —               |
| <i>Thermomyces dupontii</i>          | CBS 236.58    | MH857768        | MH869301        | MT365146        | —               | —        | JN121611        |
| <i>Thielavia terrestris</i>          | LPHT 226      | MH305267        | —               | —               | —               | —        | —               |
| <i>Thyridium vestitum</i>            | AFTOL ID 172  | —               | AY544671        | AY544715        | DQ471058        | DQ471129 | DQ470890        |
| <i>Torpedospora radiata</i>          | AFTOL-ID 751  | —               | DQ470951        | DQ470999        | DQ471070        | DQ471144 | DQ470902        |
| <i>Tremella austral</i>              | Wu 154        | MT445848        | MT425188        | —               | MT445760        | —        | MT445753        |
| <i>Tremella brasiliensis</i>         | CBS 6966R     | AF444429        | AF189864        | KF036694        | KF037200        | —        | KF036938        |
| <i>Tremella flava</i>                | CBS 8471R     | KY105681        | KY109891        | KF036699        | KF037205        | KF036527 | KF036943        |
| <i>Tremella fuciformis</i>           | CBS 6970R     | KY105683        | AF075476        | KF036701        | KF037207        | KF036529 | —               |
| <i>Trichaleurina javanica</i>        | HKAS 88981    | <b>MG871291</b> | <b>MG871326</b> | <b>MG859241</b> | <b>MG980693</b> | —        | <b>MG980716</b> |
| <i>Trichoderma harzianum</i>         | CECT 2413     | AF278790        | —               | —               | —               | —        | —               |
| <i>Trichoderma reesei</i>            | T1            | MZ650922        | —               | —               | —               | —        | —               |
| <i>Trichoderma virens</i>            | CBS 127064    | MH864402        | MH875844        | —               | —               | —        | —               |
| <i>Trichoderma viride</i>            | CBS 101526    | AY380908        | —               | —               | AY376053        | —        | EU248599        |
| <i>Trichoglossum hirsutum</i>        | AFTOL_ID 64   | DQ491494        | AY544653        | AY544697        | DQ471049        | DQ471119 | DQ470881        |
| <i>Trichomerium deniquilatum</i>     | MFLUCC10-0884 | JX313654        | JX313660        | —               | —               | —        | —               |
| <i>Trichomonascus apis</i>           | CBS:10923     | KY105700        | KY109911        | —               | —               | —        | —               |
| <i>Trichomonascus ciferrii</i>       | NBRC 1854     | LC158133        | LC158142        | —               | —               | —        | —               |

|                                            |              |           |           |           |          |          |          |
|--------------------------------------------|--------------|-----------|-----------|-----------|----------|----------|----------|
| <i>Trigonopsis californica</i>             | CBS:10351    | KY105760  | KY109968  | —         | —        | —        | —        |
| <i>Trigonopsis variabilis</i>              | UCDFST:75-19 | KY037861  | KY037829  | —         | —        | —        | —        |
| <i>Tritirachium cinnamomeum</i>            | CBS 182.42   | NR_145372 | NG_063987 | NG_064977 | —        | —        | —        |
| <i>Tritirachium oryzae</i>                 | CBS 324.81   | MH861349  | MH873108  | —         | —        | —        | —        |
| <i>Tritirachium roseum</i>                 | CBS 183.42   | NR_155894 | KF258731  | NG_062824 | —        | —        | JF779656 |
| <i>Umbelopsis ramanniana</i>               | CGMCC 3.6646 | MF417288  | MF417113  | MF417068  | —        | —        | —        |
| <i>Ustilago esculenta</i>                  | MAFF305619   | AB211929  | AB211929  | —         | —        | —        | —        |
| <i>Ustilago nunavutica</i>                 | DAOM 91211   | KF381025  | KF381049  | —         | —        | —        | —        |
| <i>Valsaria lopadostomoides</i>            | CBS 139062   | NR_137968 | KP687868  | KP687972  | KP688037 | —        | KP687943 |
| <i>Verrucaria rupestris</i>                | SS043        | EU553501  | EU598724  | —         | —        | EU723786 | —        |
| <i>Verticillium lecanii</i>                | IMI 304807   | AJ292382  | —         | —         | —        | —        | —        |
| <i>Verticillium leptobactrum</i>           | UFMGCB 6292  | KC811000  | —         | —         | —        | —        | —        |
| <i>Xenocyindrosporium kirstenboschense</i> | —            | GU229890  | GU229891  | —         | —        | —        | —        |
| <i>Xylobotryum portentosum</i>             | —            | MH468792  | MH468792  | MH468792  | —        | MH468799 | MH468795 |
| <i>Xylobotryum portentosum</i>             | —            | MH468791  | MH468791  | MH468791  | —        | MH468798 | MH468794 |
| <i>Xylona heveae</i>                       | TC269        | JQ838225  | JQ838239  | JQ838236  | —        | JQ838243 | JQ838246 |
| <i>Xylona heveae</i>                       | TC161        | JQ838232  | JQ838238  | JQ838237  | —        | JQ838242 | JQ838244 |
| <i>Zopfiella karachiensis</i>              | CBS 657.74   | MH872621  | KP981447  | —         | —        | —        | KP981630 |
